# Supplementary material
Source: PubMed Central journal article supplement (PMC7336008)
Supplement: mmc1.pdf [file mmc1.pdf]

## SUPPLEMENTARY REFERENCES

- S1. Li Z, Wu M, Yao J, et al. Caution on Kidney Dysfunctions of COVID-19 Patients. medRxiv 2020:2020.02.08.20021212.
- S2. Wang L, Li X, Chen H, et al. Coronavirus Disease 19 Infection Does Not Result in Acute Kidney Injury: An Analysis of 116 Hospitalized Patients from Wuhan, China. *Am J Nephrol* 2020:1-6.
- S3. Chen C, Gao G, Xu Y, et al. SARS-CoV-2-Positive Sputum and Feces After Conversion of Pharyngeal Samples in Patients With COVID-19. *Ann Intern Med* 2020.
- S4. Arabi YM, Arifi AA, Balkhy HH, et al. Clinical course and outcomes of critically ill patients with Middle East respiratory syndrome coronavirus infection. *Ann Intern Med* 2014;160:389-97.
- S5. Guan WJ, Ni ZY, Hu Y, et al. Clinical Characteristics of Coronavirus Disease 2019 in China. *The New England journal of medicine* 2020.
- S6. Chen N, Zhou M, Dong X, et al. Epidemiological and clinical characteristics of 99 cases of 2019 novel coronavirus pneumonia in Wuhan, China: a descriptive study. *Lancet (London, England)* 2020;395:507-13.
- S7. Zhou F, Yu T, Du R, et al. Clinical course and risk factors for mortality of adult inpatients with COVID-19 in Wuhan, China: a retrospective cohort study. *Lancet (London, England)* 2020;395:1054-62.
- S8. Hamming I, Cooper ME, Haagmans BL, et al. The emerging role of ACE2 in physiology and disease. *J Pathol* 2007;212:1-11.
- S9. Lambeir AM, Durinx C, Scharpe S, De Meester I. Dipeptidyl-peptidase IV from bench to bedside: an update on structural properties, functions, and clinical aspects of the enzyme DPP IV. *Crit Rev Clin Lab Sci* 2003;40:209-94.
- S10. Srikiatkachorn A, Mathew A, Rothman AL. Immune-mediated cytokine storm and its role in severe dengue. *Semin Immunopathol* 2017;39:563-74.
- S11. Kuo MC, Lu PL, Chang JM, et al. Impact of renal failure on the outcome of dengue viral infection. *Clin J Am Soc Nephrol* 2008;3:1350-6.
- S12. Kupin WL. Viral-Associated GN: Hepatitis B and Other Viral Infections. *Clin J Am Soc Nephrol* 2017;12:1529-33.
- S13. Peiris JS, Chu CM, Cheng VC, et al. Clinical progression and viral load in a community outbreak of coronavirus-associated SARS pneumonia: a prospective study. *Lancet (London, England)* 2003;361:1767-72.
- S14. Ding Y, He L, Zhang Q, et al. Organ distribution of severe acute respiratory syndrome (SARS) associated coronavirus (SARS-CoV) in SARS patients: implications for pathogenesis and virus transmission pathways. *J Pathol* 2004;203:622-30.
- S15. Aiamkitsumrit B, Sullivan NT, Nonnemacher MR, Pirrone V, Wigdahl B. Human Immunodeficiency Virus Type 1 Cellular Entry and Exit in the T Lymphocytic and Monocytic Compartments: Mechanisms and Target Opportunities During Viral Disease. *Adv Virus Res* 2015;93:257-311.
- S16. Paueksakon P, Fogo AB. Autopsy Renal Pathology. *Surg Pathol Clin* 2014;7:321-55.
- S17. Kocovski L, Duflou J. Can renal acute tubular necrosis be differentiated from autolysis at autopsy? *J Forensic Sci* 2009;54:439-42.
- S18. Fogo AB, Lusco MA, Najafian B, Alpers CE. *AJKD Atlas of Renal Pathology: Ischemic Acute Tubular Injury*. *Am J Kidney Dis* 2016;67:e25.
